# Supplementary material
Source: MDPI journal article supplement (https://www.mdpi.com/1424-8247/14/11/1119)
Supplement: s1 [file s1]

## Supplementary Information

### Synthesis and antiproliferative evaluation of 3-chloroazetidin-2-ones with antimitotic activity: Heterocyclic bridged analogues of Combretastatin A-4

**Azizah M. Malebari<sup>\*1</sup>, Shu Wang<sup>\*2</sup>, Thomas F. Greene<sup>2</sup>, Niamh M. O'Boyle<sup>2</sup>, Darren Fayne<sup>3</sup>, Mohemmed Faraz Khan<sup>3</sup>, Seema M. Nathwani<sup>4</sup>, Brendan Twamley<sup>5</sup>, Thomas McCabe<sup>5</sup>, Daniela M. Zisterer<sup>4</sup> and Mary J. Meegan<sup>2,\*\*</sup>**

<sup>1</sup> Department of Pharmaceutical Chemistry, College of Pharmacy, King Abdulaziz University, Jeddah 21589, Saudi Arabia; [amelibary@kau.edu.sa](mailto:amelibary@kau.edu.sa) (A.M.M.).

<sup>2</sup> School of Pharmacy and Pharmaceutical Sciences, Trinity College Dublin, Trinity Biomedical Sciences Institute, 152-160 Pearse Street, Dublin 2 DO2R590, Ireland; [wangsh@tcd.ie](mailto:wangsh@tcd.ie) (S.W.); [tgreene@tcd.ie](mailto:tgreene@tcd.ie) (T.F.G.); [Niamh.OBoyle@tcd.ie](mailto:Niamh.OBoyle@tcd.ie) (N.M.O'B.)

<sup>3</sup> Molecular Design Group, School of Biochemistry and Immunology, Trinity College Dublin, Trinity Biomedical Sciences Institute, 152-160 Pearse Street, Dublin 2 DO2R590, Ireland; [FAYNED@tcd.ie](mailto:FAYNED@tcd.ie) (D.F.); [mfkhan@tcd.ie](mailto:mfkhan@tcd.ie) (M.F.K.)

<sup>4</sup> School of Biochemistry and Immunology, Trinity College Dublin, Trinity Biomedical Sciences Institute, 152-160 Pearse Street, Dublin 2 DO2R590, Ireland; [seema.nathwani@outlook.com](mailto:seema.nathwani@outlook.com) (S.M.N.); [dzistrer@tcd.ie](mailto:dzistrer@tcd.ie) (D.M.Z.)

<sup>5</sup> School of Chemistry, Trinity College Dublin, Dublin 2 DO2R590, Ireland; [TWAMLEYB@tcd.ie](mailto:TWAMLEYB@tcd.ie) (B.T.); [TMCCABE@tcd.ie](mailto:TMCCABE@tcd.ie) (T.M.)

<sup>\*</sup> Co-First Authors: contributed equally to the work

<sup>\*\*</sup> Correspondence: [mmeegan@tcd.ie](mailto:mmeegan@tcd.ie) (M.J.M.); Tel.: +353-1-896-2798; Fax: +353-1-8962793

## Supplementary Information

### Chemistry Experimental

**Table S1:** Tier-1 Profiling Screen of Selected 3-chloroazetidinones, 3,3-dichloroazetidinones and related compounds

**Table S2:** ADMET and Lipinski Properties for Selected 3-chloroazetidinones, 3,3-dichloroazetidinones and related compounds

**Table S3:** Standard COMPARE Analysis of compounds **10e**, **11n** and **16d**

**Table S4:** Cell cycle analysis of MCF-7 cells following treatment with **10n**.

**Figure S1:** Effect of control compound CA-4 on tubulin polymerization *in vitro*

**Figures S2-S21:**  $^1\text{H}$  NMR and  $^{13}\text{C}$  NMR spectra

### References

## Chemistry Experimental

All chemicals were commercial purchased and were used without further purification unless otherwise indicated. Solvents were either purchased dry or purified by distillation in accordance with literature methods. Dichloromethane was dried by distillation from calcium hydride prior to use. Tetrahydrofuran (THF) was distilled immediately prior to use from Na/Benzophenone under a slight positive pressure of nitrogen. Toluene was dried by distillation from calcium hydride and stored on activated molecular sieves (4Å). Melting points were determined on a Gallenkamp SMP 11 melting point apparatus using a mercury 300 °C thermometer and are uncorrected. Infra-red (IR) spectra were recorded as KBr discs or as thin films on NaCl disk on a Perkin Elmer FT-IR Paragon 1000 spectrometer. <sup>1</sup>H and <sup>13</sup>C nuclear magnetic resonance (NMR) spectra were recorded at 20 °C on a Bruker DPX 400 spectrometer (400.13 MHz, <sup>1</sup>H; 100.61 MHz, <sup>13</sup>C) in deuterated chloroform (CDCl<sub>3</sub>), DMSO-*d*<sub>6</sub> or methanol (CD<sub>3</sub>OD) (internal standard tetramethylsilane (TMS)) by Dr. John O'Brien and Dr. Manuel Ruether in the School of Chemistry, Trinity College Dublin. Coupling constants were reported in Hertz (Hz). Abbreviations used in the assigning of the spectra include s = singlet, br s = broad singlet, d = doublet, t = triplet, q = quartet and m = multiplet. For <sup>1</sup>H-NMR assignments, chemical shifts were reported: shift value (description of absorption, coupling constant(s) where applicable, and number of protons). High resolution mass spectrometry (HRMS) was obtained in the School of Chemistry by Dr Martin Feeney or School of Pharmacy and Pharmaceutical Sciences by Mr Brian Talbot, Trinity College Dublin. HRMS was carried on in the positive ion mode on a liquid chromatography time-of flight mass spectrometer (Micromass LCT, Waters Ltd., Manchester, UK). The samples were introduced into the ion source by an LC system (Waters Alliance 2795, Waters Corporation, USA) in acetonitrile:water (60:40% v/v) at 200 µL/min. The capillary voltage of the mass spectrometer was at 3 kV. The sample cone (de-clustering) voltage was set at 40 V. For exact mass determination, the instrument was externally calibrated for the mass range *m/z* 100 to *m/z* 1000. A lock (reference) mass (*m/z* 556.2771) was used. High resolution mass spectrometry scans were also performed using Electrospray Ionization operated in negative and positive ion modes on a LTQ / Orbitrap Discovery Mass Spectrometer, and samples were dissolved in CH<sub>3</sub>OH. Mass measurement accuracies of < ±5 ppm were obtained. Low resolution mass spectra (LRMS) were acquired on a Hewlett-Packard 5973 MSD GC-MS system in electron impact (EI) mode. Thin layer chromatography was performed using Merck silica gel 60 TLC aluminium sheets with fluorescent indicator visualizing with UV light at 254 nm. Flash column chromatography was carried out on Merck Kieselgel 60 (particle size 0.040 mm-0.063 mm).

Chromatographic separations were also carried out on Biotage SP4 instrument. All products isolated were homogenous on TLC. Microwave experiments were performed with the Biotage initiator and Discover CEM microwave synthesizers. Determination of the purity of the final compounds was achieved by analytical high-performance liquid chromatography (HPLC) using a Waters 2487 Dual Wavelength Absorbance detector, Waters 1525 binary HPLC pump, Waters In-Line Degasser AF and Waters 717plus Autosampler. The column used was a Varian Pursuit XRs C18 reverse phase  $250 \times 4.6$  mm chromatography column. Samples were detected using a wavelength of 254 nm. All samples were analysed using acetonitrile (60%):water (40%) with 0.1% (v/v) TFA over 10 minutes and a flow rate of 1 mL/min.

### **3-(*t*-Butyl-dimethyl-silanyloxy)-4-methoxy-benzaldehyde**

To a solution of 3-hydroxy-4-methoxybenzaldehyde (5 mmol) and *t*-butyl dimethylsilylchloride (6 mmol) in anhydrous DCM (40 mL) under a nitrogen atmosphere, DBU (8 mmol) was added dropwise *via* a syringe. The reaction mixture was stirred under nitrogen for 4 h (monitored by TLC (50:50 hexane/ethyl acetate) until reaction was complete. The reaction mixture was diluted with dichloromethane (50 mL) and washed with water (2 x 100mL), HCl (0.1M, 2 x 50 mL), saturated NaHCO<sub>3</sub> aqueous solution (2 x 50 mL), and dried over Na<sub>2</sub>SO<sub>4</sub>. The solvent was removed under reduced pressure to yield the product as a colourless oil, 1.25g, (94%). IR<sub>max</sub>: (NaCl) 1689 cm<sup>-1</sup> (C=N). <sup>1</sup>H NMR (400MHz, CDCl<sub>3</sub>):  $\delta$  0.11 (6H, s, Si(CH<sub>3</sub>)<sub>2</sub>, C(CH<sub>3</sub>)<sub>3</sub>), 0.93 (9H, s, Si(CH<sub>3</sub>)<sub>2</sub> C(CH<sub>3</sub>)<sub>3</sub>), 3.81 (3H, s, -OMe), 6.88 (1H, d, J=8.52, H<sub>5</sub>), 7.32 (1H, s, H<sub>2</sub>), 7.48 (1H, d, J=2Hz, H<sub>6</sub>). <sup>13</sup>C NMR (100 MHz, CDCl<sub>3</sub>):  $\delta$  -5.19, 17.86, 25.15 (TBDMS), 54.95 (OMe), 110.69 (C<sub>5</sub>), 119.31 (C<sub>2</sub>), 125.90 (C<sub>6</sub>), 129.66 (C<sub>1</sub>), 145.02 (C<sub>3</sub>), 156.07 (C<sub>4</sub>), 190.27 (CHO). HRMS: found 266.1349 [M<sup>+</sup>]; C<sub>14</sub>H<sub>22</sub>O<sub>3</sub>Si requires 266.1338.

### **General method for Preparation of 3-chloroazetidin-2-ones and 3,3-dichloroazetidin-2-ones**

To a stirring, refluxing solution of the imine (5 mmol) and triethylamine (6 mmol) in anhydrous dichloromethane (40 mL), a solution of chloro or dichloroacetyl chloride (6 mmol) in anhydrous dichloromethane (10 mL) was injected dropwise through a rubber septum over 45 minutes under nitrogen. The reaction was refluxed during the day (5 h) and at room temperature overnight, continuously under nitrogen. The reaction was transferred to a separating funnel and washed with water (2x100 mL), with the organic layer being retained each time. The reaction was dried over anhydrous sodium sulfate before the solvent was removed under reduced

pressure. The crude product was purified by flash chromatography over silica gel eluted with 4:1 *n*-hexane: ethyl acetate as eluent.

**3-Chloro-4-(4-ethoxyphenyl)-1-(3,4,5-trimethoxyphenyl)azetidin-2-one (10f)** preparation as described in the general method above from imine **9f** and chloroacetyl chloride, Yield: 6.6 %, 130 mg, brown oil [1]. IR (NaCl, film)  $\nu_{\max}$ : 2605, 2497, 1763 (C=O,  $\beta$ -lactam), 1568, 1508, 1240, 1128  $\text{cm}^{-1}$ .  $^1\text{H}$  NMR (400MHz,  $\text{CDCl}_3$ ):  $\delta$  1.28 (t,  $J$  = 7.28 Hz, 3H,  $\text{OCH}_2\text{CH}_3$ ), 3.72 (s, 6H,  $\text{OCH}_3$ ), 3.78 (s, 3H,  $\text{OCH}_3$ ), 4.05 (q,  $J$  = 7.04 Hz, 2H,  $\text{OCH}_2\text{CH}_3$ ), 4.63 (d,  $J$  = 2.00 Hz, 1H,  $\text{H}_4$ ), 4.94 (br s, 1H,  $\text{H}_3$ ), 6.55 (s, 2H,  $\text{H}_2'$   $\text{H}_6'$ ), 6.95 (d,  $J$  = 8.52 Hz, 2H,  $\text{H}_3''$   $\text{H}_5''$ ), 7.32 (d,  $J$  = 8.52 Hz, 2H,  $\text{H}_2''$   $\text{H}_6''$ ).  $^{13}\text{C}$  NMR (100MHz,  $\text{CDCl}_3$ ):  $\delta$  14.28 ( $\text{OCH}_2\text{CH}_3$ ), 55.59, 60.51 ( $\text{OCH}_3$ ), 62.74 ( $\text{C}_3$ ), 63.18 ( $\text{OCH}_2\text{CH}_3$ ), 65.71 ( $\text{C}_4$ ), 94.77 ( $\text{C}_2'$ ,  $\text{C}_6'$ ), 114.86 ( $\text{C}_3''$ ,  $\text{C}_5''$ ), 126.13 ( $\text{C}_4'$ ), 127.08 ( $\text{C}_2''$ ,  $\text{C}_6''$ ), 132.53 ( $\text{C}_1''$ ), 134.59 ( $\text{C}_1'$ ), 153.07 ( $\text{C}_3'$ ,  $\text{C}_5'$ ), 159.44 ( $\text{C}_4''$ ), 160.31 ( $\text{C}_2$ ). HRMS: found 414.1100  $[\text{M}+\text{Na}]^+$ ;  $\text{C}_{20}\text{H}_{22}^{35}\text{ClNO}_5\text{Na}$  requires 414.1084.

**3-Chloro-4-(4-(methylthio)phenyl)-1-(3,4,5-trimethoxyphenyl)azetidin-2-one (10i):** was synthesised following the general method above from imine **9i** and chloroacetyl chloride to afford the desired product as an orange powder; yield: 57%, Mp: 102 – 104 °C, [1] (HPLC): 97%. IR  $\nu_{\max}$  (ATR): 1747.2 (C=O)  $\text{cm}^{-1}$ .  $^1\text{H}$  NMR (400 MHz,  $\text{CDCl}_3$ ):  $\delta$  2.47 (s, 3 H,  $\text{SCH}_3$ ), 3.69 (s, 6 H,  $\text{OCH}_3$ ), 3.75 (s, 3 H,  $\text{OCH}_3$ ), 4.58 (d,  $J$  = 1.22 Hz, 1 H,  $\text{H}_4$ ), 4.91 (d,  $J$  = 1.22 Hz, 1 H,  $\text{H}_3$ ), 6.50 (s, 2 H, ArH), 7.27 - 7.82 (m, 4 H, ArH).  $^{13}\text{C}$  NMR (100 MHz,  $\text{CDCl}_3$ ):  $\delta$  15.35, 56.07, 60.91, 63.07, 66.01, 95.29, 126.54, 126.84, 131.34, 132.80, 135.24, 140.77, 153.57, 160.50 ( $\text{C}_2$ , C=O). HRMS: found 416.0688  $[\text{M} + \text{Na}]^+$ ;  $\text{C}_{19}\text{H}_{20}^{35}\text{ClNNaO}_4\text{S}$  requires 416.0699.

**3,3-Dichloro-1-(3,4,5-trimethoxyphenyl)-4-(4-methoxyphenyl)azetidin-2-one (11e)** preparation as described in the general method above from imine **9e** and dichloroacetyl chloride, Yield: 28.3 %, 583 mg, yellow oil, (HPLC): 94.1% [1]. IR (NaCl, film)  $\nu_{\max}$ : 2942, 2683, 1777 (C=O,  $\beta$ -lactam), 1598, 1507, 1255, 1126  $\text{cm}^{-1}$ .  $^1\text{H}$  NMR (400MHz,  $\text{CDCl}_3$ ):  $\delta$  3.73 (s, 6H,  $\text{OCH}_3$ ), 3.80 (s, 3H,  $\text{OCH}_3$ ), 3.85 (s, 3H,  $\text{OCH}_3$ ), 5.45 (s, 1H,  $\text{H}_4$ ), 6.56 (s, 2H,  $\text{H}_2'$   $\text{H}_6'$ ), 6.97 (d,  $J$  = 8.52 Hz, 2H,  $\text{H}_3''$   $\text{H}_5''$ ), 7.29 (d,  $J$  = 8.56 Hz, 2H,  $\text{H}_2''$   $\text{H}_6''$ ).  $^{13}\text{C}$  NMR (100MHz,  $\text{CDCl}_3$ ):  $\delta$  54.89, 55.68, 60.52 ( $\text{OCH}_3$ ), 73.61 ( $\text{C}_4$ ), 83.80 ( $\text{C}_3$ ), 95.41 ( $\text{C}_2'$ ,  $\text{C}_6'$ ), 113.89 ( $\text{C}_3''$ ,  $\text{C}_5''$ ), 122.90 ( $\text{C}_4'$ ), 128.80 ( $\text{C}_2''$ ,  $\text{C}_6''$ ), 131.45 ( $\text{C}_1''$ ), 135.19 ( $\text{C}_1'$ ), 153.17 ( $\text{C}_3'$ ,  $\text{C}_5'$ ), 157.96 ( $\text{C}_4''$ ), 160.36 ( $\text{C}_2$ ). HRMS: found 412.0715  $[\text{M}+\text{H}]^+$ ;  $\text{C}_{19}\text{H}_{20}^{35}\text{Cl}_2\text{NO}_5$  requires 412.0719.

**3,3-Dichloro-4-(4-ethoxyphenyl)-1-(3,4,5-trimethoxyphenyl)azetidin-2-one (11f)**

preparation as described in the general method above from imine **9f** and dichloroacetyl chloride, Yield: 28.9 %, 615 mg, brown oil [1]. IR (NaCl, film)  $\nu_{\max}$ : 2605, 2498, 1778 (C=O,  $\beta$ -lactam), 1600, 1507, 1241, 1127  $\text{cm}^{-1}$ .  $^1\text{H}$  NMR (400MHz,  $\text{CDCl}_3$ ):  $\delta$  1.44 (t,  $J = 7.02\text{Hz}$ , 3H,  $\text{OCH}_2\text{CH}_3$ ), 3.73 (s, 6H,  $\text{OCH}_3$ ), 3.80 (s, 3H,  $\text{OCH}_3$ ), 4.06 (q,  $J = 7.00\text{ Hz}$ , 2H,  $\text{OCH}_2\text{CH}_3$ ), 5.44 (s, 1H,  $\text{H}_4$ ), 6.56 (s, 2H,  $\text{H}_2'$   $\text{H}_6'$ ), 6.96 (d,  $J = 8.76\text{ Hz}$ , 2H,  $\text{H}_3''$   $\text{H}_5''$ ), 7.27 (d,  $J = 8.80\text{ Hz}$ , 2H,  $\text{H}_2''$   $\text{H}_6''$ ).  $^{13}\text{C}$  NMR (100MHz,  $\text{CDCl}_3$ ):  $\delta$  14.29 ( $\text{OCH}_2\text{CH}_3$ ), 55.66, 60.52 ( $\text{OCH}_3$ ), 63.13 ( $\text{OCH}_2\text{CH}_3$ ), 73.65 ( $\text{C}_4$ ), 83.80 ( $\text{C}_3$ ), 95.40 ( $\text{C}_2'$ ,  $\text{C}_6'$ ), 114.33 ( $\text{C}_3''$ ,  $\text{C}_5''$ ), 122.68 ( $\text{C}_4'$ ), 128.77 ( $\text{C}_2''$ ,  $\text{C}_6''$ ), 131.47 ( $\text{C}_1''$ ), 135.15 ( $\text{C}_1'$ ), 153.15 ( $\text{C}_3'$ ,  $\text{C}_5'$ ), 157.98 ( $\text{C}_4''$ ), 159.78 ( $\text{C}_2$ ) HRMS: found 424.0724  $[\text{M}-\text{H}]^-$ ,  $\text{C}_{20}\text{H}_{20}^{35}\text{Cl}_2\text{NO}_5$  requires 424.0719.

**3,3-Dichloro-4-(4-(methylthio)phenyl)-1-(3,4,5-trimethoxyphenyl)azetidin-2-one (11i):**

was synthesised following the general method above from imine **9i** and dichloroacetyl chloride to afford the product as a brown powder; yield: 63%, Mp: 118 – 119 °C, [1] (HPLC): 98.9%. IR $\nu_{\max}$  (ATR): 1770.2 (C=O)  $\text{cm}^{-1}$ .  $^1\text{H}$  NMR (400 MHz,  $\text{CDCl}_3$ ):  $\delta$  2.48 (s, 3 H,  $\text{SCH}_3$ ), 3.70 (s, 6 H,  $\text{OCH}_3$ ), 3.77 (s, 3 H,  $\text{OCH}_3$ ), 5.42 (s, 1 H,  $\text{H}_4$ ), 6.52 (s, 2 H, ArH), 7.20 - 7.23 (m, 2 H, ArH), 7.25 - 7.28 (m, 2 H, ArH).  $^{13}\text{C}$  NMR (100 MHz,  $\text{CDCl}_3$ ):  $\delta$  15.10, 56.16, 60.94, 73.96, 84.00, 95.88, 126.06, 128.13, 131.75, 135.80, 141.38, 153.65, 158.24 ( $\text{C}_2$ , C=O). HRMS: found 450.0320  $[\text{M} + \text{Na}]^+$ ;  $\text{C}_{19}\text{H}_{19}^{35}\text{Cl}_2\text{NNaO}_4\text{S}$  requires 450.0310.

**3-Chloro-4-(3-chloro-4-methoxyphenyl)-1-(3,4,5-trimethoxyphenyl) azetidin-2-one (10o):**

was synthesised using the general above from imine **9r**, and chloroacetyl chloride to afford the product as an oil; yield: 42%, purity (HPLC): 99%, [2]. IR  $\nu_{\max}$  (ATR): 1758.6 (C=O)  $\text{cm}^{-1}$ .  $^1\text{H}$  NMR (400 MHz,  $\text{CDCl}_3$ ):  $\delta$  3.76 (s, 6 H,  $\text{OCH}_3$ ), 3.81 (s, 3 H,  $\text{OCH}_3$ ), 3.95 (s, 3 H,  $\text{OCH}_3$ ), 4.63 (d,  $J = 2.20\text{ Hz}$ , 1 H,  $\text{H}_4$ ), 4.93 (d,  $J = 1.47\text{ Hz}$ , 1 H,  $\text{H}_3$ ), 6.55 (s, 2 H, ArH), 6.99 (d,  $J = 8.07\text{ Hz}$ , 1 H, ArH), 7.27 (d,  $J = 2.20\text{ Hz}$ , 1 H, ArH), 7.45 (d,  $J = 2.20\text{ Hz}$ , 1 H, ArH).  $^{13}\text{C}$  NMR (100 MHz,  $\text{CDCl}_3$ ):  $\delta$  56.12, 60.93, 63.07, 65.39, 95.29, 112.60, 123.67, 125.56, 128.04, 132.68, 153.62, 155.90, 160.36 ( $\text{C}_2$ , C=O). HRMS: calculated for  $\text{C}_{19}\text{H}_{19}^{35}\text{Cl}_2\text{NaNO}_5$   $[\text{M}+\text{Na}]^+$  434.0538; found 434.0521.

**3,3-Dichloro-4-(4-methoxy-3-methylphenyl)-1-(3,4,5-trimethoxyphenyl)azetidin-2-one (11o):**

was synthesised using the general procedure above from imine **9p** and dichloroacetyl chloride to afford the product as yellow solid; yield: 50%, Mp: 150 °C, purity (HPLC): 95%,

[2]. IR  $\nu$  max (ATR): 1766.4 (C=O)  $\text{cm}^{-1}$ .  $^1\text{H}$  NMR (400 MHz,  $\text{CDCl}_3$ ):  $\delta$  ppm 2.17 (s, 3 H,  $\text{CH}_3$ ), 3.67 (s, 6 H,  $\text{OCH}_3$ ), 3.73 (s, 3 H,  $\text{OCH}_3$ ), 3.79 (s, 3 H,  $\text{OCH}_3$ ), 5.37 (s, 1 H, H4), 6.52 (s, 2 H, ArH), 6.80 (d,  $J = 8.29$  Hz, 1 H, ArH), 7.01 - 7.16 (m, 2 H, ArH).  $^{13}\text{C}$  NMR (100 MHz,  $\text{CDCl}_3$ ):  $\delta$  ppm 16.31, 55.30, 56.09, 60.86, 84.31, 95.96, 109.87, 122.76, 126.61, 127.32, 129.88, 131.94, 135.65, 153.57, 158.41, 162.11 (C2, C=O). HRMS: calculated for  $\text{C}_{20}\text{H}_{22}^{35}\text{Cl}_2\text{NO}_5$   $[\text{M} + \text{H}]^+$  426.0875; found 426.0863.

**Table S1: Tier-1 Profiling Screen of Selected 3-chloroazetidinones, 3,3-dichloroazetidinones and related compounds<sup>a</sup>**

| Compound                                                                            | ID  | ADMET Solubility <sup>b</sup> | ADMET Solubility Level <sup>c</sup> | ADMET BBB <sup>d</sup> | ADMET BBB Level <sup>e</sup> | ADMET CYP2D6 Prediction <sup>f</sup> | ADMET Hepatotoxic Prediction <sup>g</sup> |
|-------------------------------------------------------------------------------------|-----|-------------------------------|-------------------------------------|------------------------|------------------------------|--------------------------------------|-------------------------------------------|
| 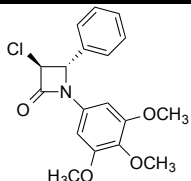   | 10a | -4.4330                       | 2                                   | 0.086000               | 1                            | false                                | true                                      |
|    | 10b | -5.0650                       | 2                                   | 0.29100                | 1                            | false                                | true                                      |
|   | 10c | -5.1380                       | 2                                   | 0.31700                | 1                            | false                                | true                                      |
|  | 10g | -5.6770                       | 2                                   | 0.42700                | 1                            | false                                | true                                      |
|  | 10k | -5.7460                       | 2                                   | 0.36700                | 1                            | false                                | true                                      |
|  | 10m | -4.3750                       | 2                                   | -0.77100               | 3                            | false                                | true                                      |
|  | 10n | -4.0300                       | 2                                   | -0.46400               | 2                            | false                                | true                                      |



|                                                                                     |            |         |   |          |   |       |      |
|-------------------------------------------------------------------------------------|------------|---------|---|----------|---|-------|------|
| 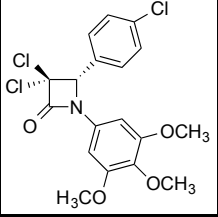   | <b>11b</b> | -5.6180 | 2 | 0.44600  | 1 | false | true |
|    | <b>11k</b> | -6.2750 | 1 | 0.52100  | 1 | false | true |
|    | <b>11m</b> | -4.9150 | 2 |          | 4 | false | true |
|   | <b>11n</b> | -4.6590 | 2 | -0.31000 | 2 | false | true |
|  | <b>14a</b> | -4.4060 | 2 | 0.086000 | 1 | false | true |
|  | <b>14b</b> | -4.6100 | 2 | 0.19400  | 1 | false | true |
|  | <b>15a</b> | -4.9640 | 2 | 0.24100  | 1 | false | true |
|  | <b>15b</b> | -5.1640 | 2 | 0.34800  | 1 | false | true |



**Table S2: ADMET and Lipinski Properties for Selected 3-chloroazetidinones, 3,3-dichloroazetidinones and related compounds<sup>a</sup>**

| Compound                                                                            | ID  | ADMET Absorption Level <sup>b</sup> | ADMET EXT PPB Prediction <sup>c</sup> | ALogP <sup>d</sup> | Molecular Weight | Num HBA | Num HBD | Num RotBonds | Molecular Volume | Molecular Polar Surface Area |
|-------------------------------------------------------------------------------------|-----|-------------------------------------|---------------------------------------|--------------------|------------------|---------|---------|--------------|------------------|------------------------------|
| 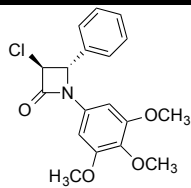   | 10a | 0                                   | true                                  | 3.205              | 347.79           | 4       | 0       | 5            | 226.37           | 48                           |
|    | 10b | 0                                   | true                                  | 3.870              | 382.24           | 4       | 0       | 5            | 247.64           | 48                           |
|   | 10c | 0                                   | true                                  | 3.954              | 426.69           | 4       | 0       | 5            | 257.24           | 48                           |
|  | 10g | 0                                   | true                                  | 4.766              | 439.89           | 5       | 0       | 7            | 285.03           | 57.230                       |
|  | 10k | 0                                   | true                                  | 4.660              | 397.85           | 4       | 0       | 5            | 259.65           | 48                           |
|  | 10m | 0                                   | true                                  | 3.083              | 422.82           | 7       | 0       | 7            | 270.62           | 103.04                       |
|  | 10n | 0                                   | true                                  | 2.670              | 393.82           | 6       | 1       | 6            | 255.19           | 77.460                       |

|                                                                                     |            |   |      |       |        |   |   |   |        |        |
|-------------------------------------------------------------------------------------|------------|---|------|-------|--------|---|---|---|--------|--------|
| 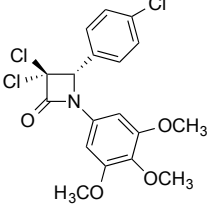   | <b>11b</b> | 0 | true | 4.370 | 416.68 | 4 | 0 | 5 | 262.39 | 48     |
|    | <b>11k</b> | 0 | true | 5.840 | 432.30 | 4 | 0 | 5 | 275.77 | 48     |
|    | <b>11m</b> | 0 | true | 3.584 | 457.26 | 7 | 0 | 7 | 284    | 103.04 |
|   | <b>11n</b> | 0 | true | 3.850 | 428.26 | 6 | 1 | 6 | 270.62 | 77.460 |
|  | <b>14a</b> | 0 | true | 3.205 | 347.79 | 4 | 0 | 5 | 231.86 | 48     |
|  | <b>14b</b> | 0 | true | 3.554 | 361.82 | 4 | 0 | 6 | 238.04 | 48     |
|  | <b>15a</b> | 0 | true | 3.706 | 382.24 | 4 | 0 | 5 | 247.98 | 48     |
|  | <b>15b</b> | 0 | true | 4.054 | 396.26 | 4 | 0 | 6 | 255.87 | 48     |

|                                                                                     |            |   |      |       |        |   |   |   |        |        |
|-------------------------------------------------------------------------------------|------------|---|------|-------|--------|---|---|---|--------|--------|
| 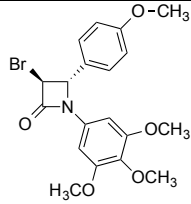   | <b>16a</b> | 0 | true | 3.540 | 422.27 | 5 | 0 | 6 | 259.30 | 57.230 |
|    | <b>16e</b> | 0 | true | 3.820 | 436.30 | 5 | 0 | 6 | 278.17 | 57.230 |
|    | <b>16f</b> | 0 | true | 3.850 | 440.26 | 5 | 0 | 6 | 265.82 | 57.230 |
|   | <b>16g</b> | 0 | true | 3.998 | 456.71 | 5 | 0 | 6 | 278.51 | 57.230 |
|  | <b>18</b>  | 1 | true | 3.193 | 508.24 | 9 | 2 | 8 | 309.04 | 133.80 |

<sup>a</sup>Calculated using Pipeline Pilot Professional (v8.5.0.200) BIOVIA, Dassault Systèmes

<sup>b</sup>ADMET Calculates ADMET Passive Intestinal Absorption properties. Accelrys passive intestinal absorption model. Absorption Level: Ranking of the molecule into one of the following levels: 0: Good; 1: Moderate; 2: Poor; 3: Very Poor

<sup>c</sup>ADMET Plasma Protein Binding (PPB) Prediction: If true, the compound is predicted to be a binder ( $\geq 90\%$ ). Otherwise, it is predicted to be a weak or nonbinder ( $< 90\%$ ).

<sup>d</sup>ChemBioDraw Ultra 13.0.2.3020

**Table S3:** Standard COMPARE analysis of compound **10e**, **11n** and **16d**<sup>a</sup>

| Rank | 10e<br>(76240)                                 | <i>r</i> | 11n<br>(76241)                                 | <i>r</i> | 16d<br>(792961)                                | <i>r</i> |
|------|------------------------------------------------|----------|------------------------------------------------|----------|------------------------------------------------|----------|
|      | <b>Based on GI<sub>50</sub><br/>mean graph</b> |          | <b>Based on GI<sub>50</sub><br/>mean graph</b> |          | <b>Based on GI<sub>50</sub><br/>mean graph</b> |          |
| 1    | Vincristine sulfate<br>hiConc:-3.0             | 0.56     | Vincristine sulfate<br>hiConc:-3.0             | 0.53     | Tiazofurin<br>hiConc:-2.0                      | 0.53     |
| 2    | Maytansine<br>hiConc:-4.0                      | 0.54     | Maytansine<br>hiConc:-4.0                      | 0.48     | Maytansine<br>hiConc:-2.0                      | 0.51     |
| 3    | Maytansine<br>hiConc:-7.0                      | 0.50     | Glycoxic acid<br>hiConc:-2.9                   | 0.46     | Methotrexate<br>hiConc:-7.0                    | 0.49     |
| 4    | Vinblastine sulfate<br>hiConc:-4.0             | 0.49     | Vinblastine sulfate<br>hiConc:-4.0             | 0.43     | Brequinar<br>hiConc:-4.0                       | 0.45     |
| 5    | Maytansine<br>hiConc:-3.0                      | 0.48     | Maytansine<br>hiConc:-3.6                      | 0.42     | Macbecin II<br>hiConc:-6.0                     | 0.45     |
|      | <b>Based on TGI<br/>mean graph<sup>b</sup></b> |          | <b>Based on TGI<br/>mean graph</b>             |          | <b>Based on TGI<br/>mean graph</b>             |          |
| 1    | Maytansine<br>hiConc:-3.6                      | 0.72     | Vincristine sulfate<br>hiConc:-3.0             | 0.61     | Ftorafur<br>hiConc:-2.3                        | 0.43     |
| 2    | Maytansine<br>hiConc:-4.0                      | 0.71     | Vinblastine sulfate<br>hiConc:-5.6             | 0.57     | Rifamycin SV<br>hiConc:-3.0                    | 0.42     |
| 3    | Vincristine sulfate<br>hiConc:-3.0             | 0.69     | Maytansine<br>hiConc:-4.0                      | 0.57     | Pibenzimol<br>hydrochloride<br>hiConc:-2.7     | 0.42     |
| 4    | Vinblastine sulfate<br>hiConc:-5.6             | 0.68     | Vinblastine sulfate<br>hiConc:- 4.0            | 0.56     | Pibenzimol<br>hydrochloride<br>hiConc:-4.0     | 0.40     |
| 5    | Vincristine sulfate<br>hiConc:-5.0             | 0.65     | Vincristine sulfate<br>hiConc:-5.0             | 0.56     | Fluorodopan<br>hiConc:-2.9                     | 0.40     |

<sup>a</sup>The target set was the standard agent database and the target set endpoints were selected to be equal to the seed end points. Standard COMPARE analysis was performed. Correlation values (*r*) are Pearson correlation coefficients. Vinblastine sulfate and Maytansine appears at different concentrations as it has been tested by the NCI at multiple concentration ranges <sup>b</sup>**10e** Based on TGI Rhizoxin ranked 6, *r*=0.61, Paclitaxel(Taxol) ranked 13, *r*=0.49.

[<https://dtp.cancer.gov> (accessed 20/9/2021)].

Table S4: Cell cycle analysis of MCF-7 cells following treatment with **10n**<sup>a</sup>.

| Compound | Time point (h) | % of cells in different phases of cell cycle |                   |                    |
|----------|----------------|----------------------------------------------|-------------------|--------------------|
|          |                | G <sub>0</sub> -G <sub>1</sub>               | G <sub>2</sub> /M | Sub-G <sub>1</sub> |
| control  | 24             | 49.66 ± 3                                    | 27.6 ±1           | 1.73±0.5           |
|          | 48             | 50.00 ± 1                                    | 22.67 ±3          | 2.53±0.2           |
|          | 72             | 50.66 ± 0.8                                  | 21.33±2           | 7.00±1             |
| 50 nM    | 24             | 19.66 ± 0.6                                  | 59.66±5           | 2.33±0.4           |
|          | 48             | 13.50 ± 2                                    | 60.76±2           | 5.10±0.5           |
|          | 72             | 11.00 ± 0.7                                  | 62.17±2           | 13.16±0.7          |
| 500 nM   | 24             | 8.40 ± 0.6                                   | 79.33±3           | 3.50±0.2           |
|          | 48             | 8.06 ± 0.2                                   | 77.53±1           | 7.60±0.7           |
|          | 72             | 8.46 ± 0.3                                   | 63.33±2           | 24.46±0.3          |

<sup>a</sup>Cell cycle analysis of MCF-7 cells treated without and with different concentrations of **10n**. Data were an average ± SD of three sets of experiments.

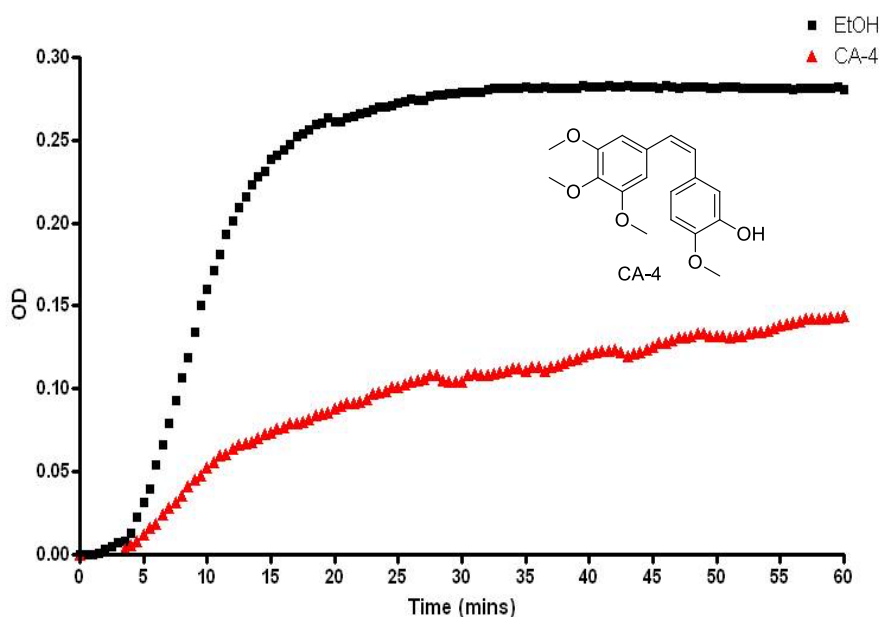

**Figure S1: Effect of CA-4 on tubulin polymerization *in vitro***

Effect of CA-4 (10  $\mu$ M), on tubulin polymerization *in vitro* ethanol (1% v/v) used as vehicle control. Purified bovine tubulin and GTP were mixed in a 96-well plate. The polymerization reaction was initiated by warming the solution from 4  $^{\circ}$ C to 37  $^{\circ}$ C. The effect on tubulin assembly was monitored in a Spectramax 340PC spectrophotometer at 340 nm at 30 s intervals for 60 min at 37  $^{\circ}$ C. Fold inhibition of tubulin polymerization was calculated using the  $v_{\max}$  value for each reaction. The results represent the mean for three separate experiments.



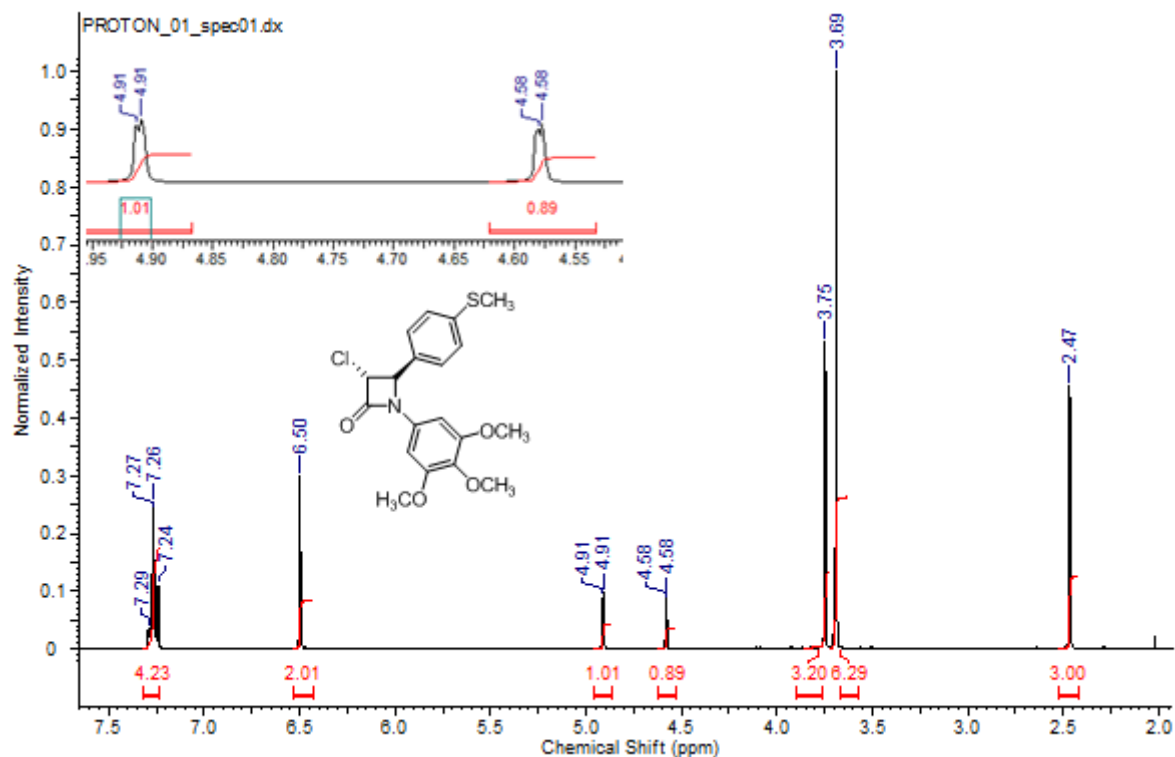

**Figure S2**  $^1\text{H}$  NMR spectrum of 3-chloro- $\beta$ -lactam **10i**

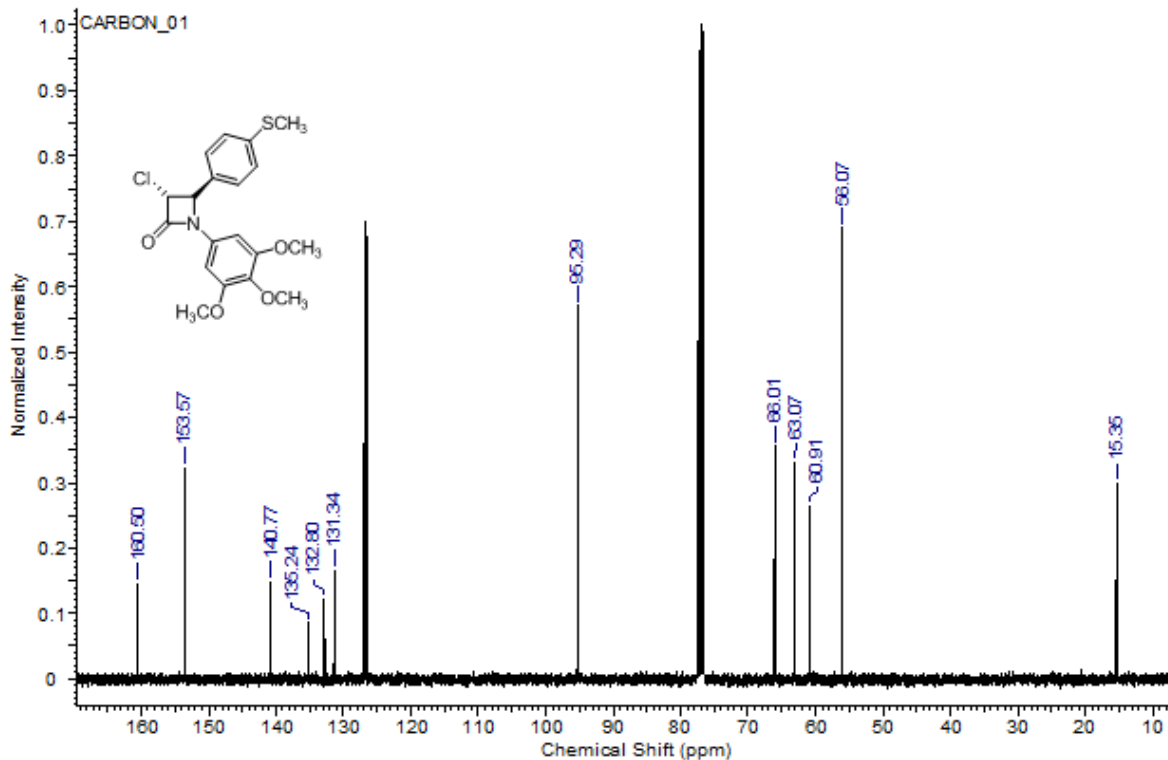

**Figure S3:**  $^{13}\text{C}$  NMR spectrum of 3-chloro- $\beta$ -lactam **10i**

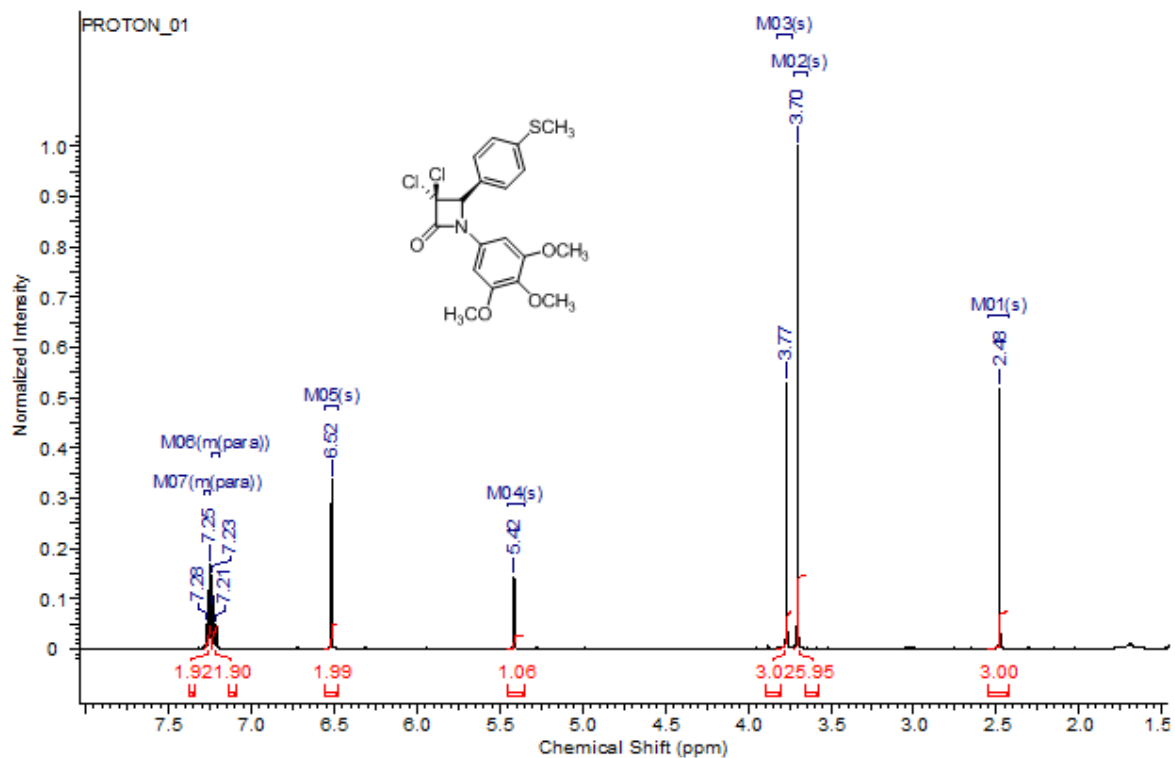

**Figure S4:**  $^1\text{H}$  NMR spectrum of 3,3-dichloro- $\beta$ -lactam **11i**

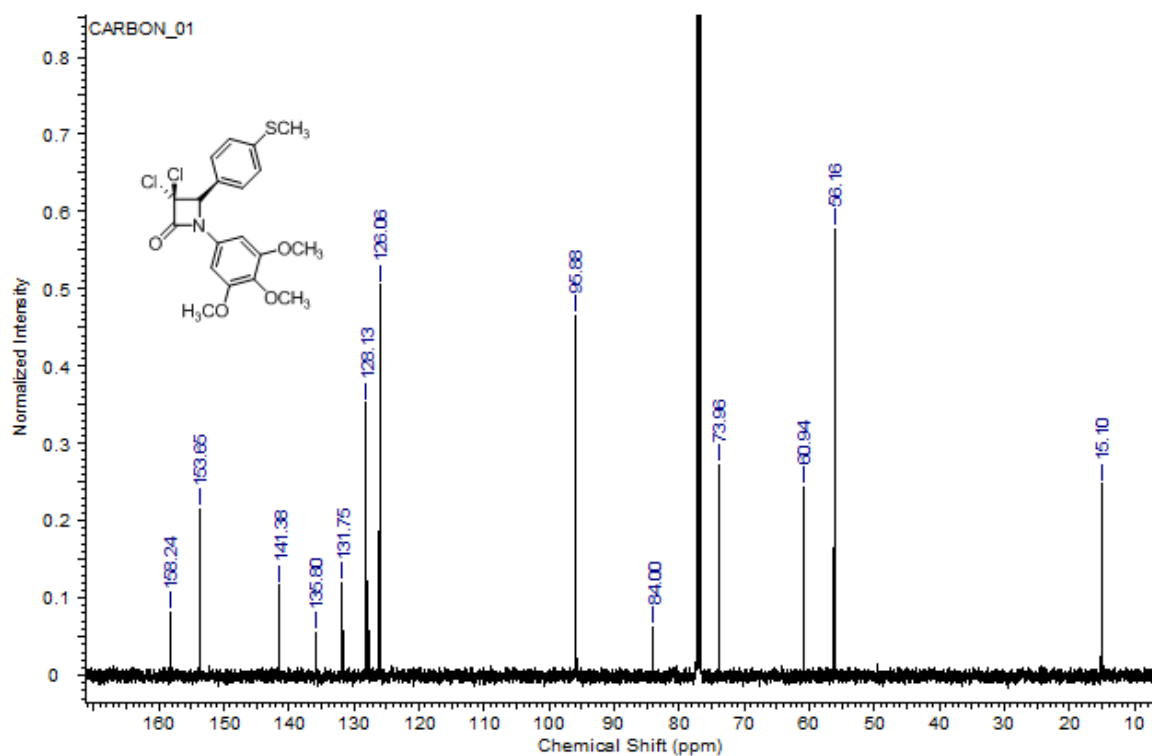

**Figure S5:**  $^{13}\text{C}$  NMR spectrum of 3,3-dichloro- $\beta$ -lactam **11i**

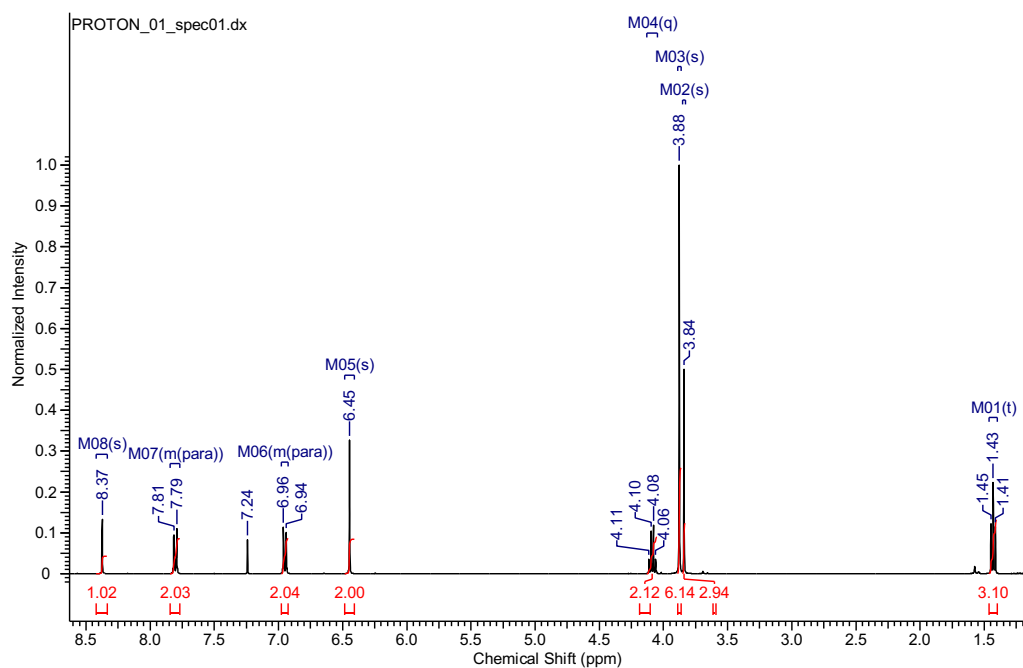

**Figure S6**  $^1\text{H}$  NMR (400 MHz,  $\text{CHLOROFORM-}d$ ) spectrum of **(9f)**

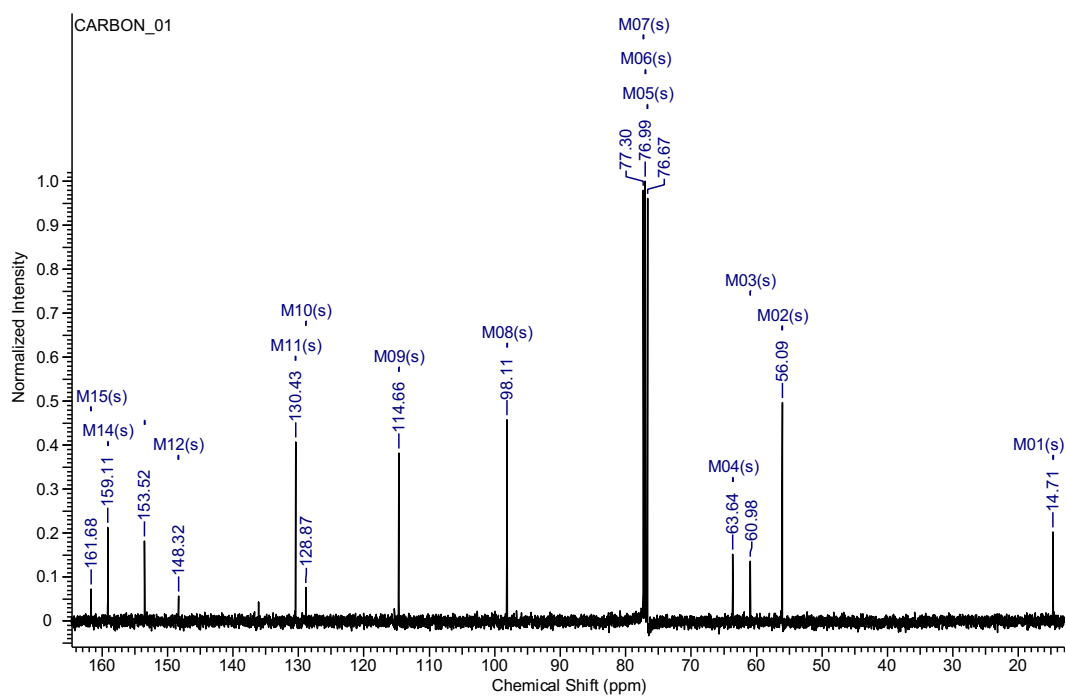

**Figure S7:**  $^{13}\text{C}$  NMR (101 MHz,  $\text{CHLOROFORM-}d$ ) spectrum of **(9f)**

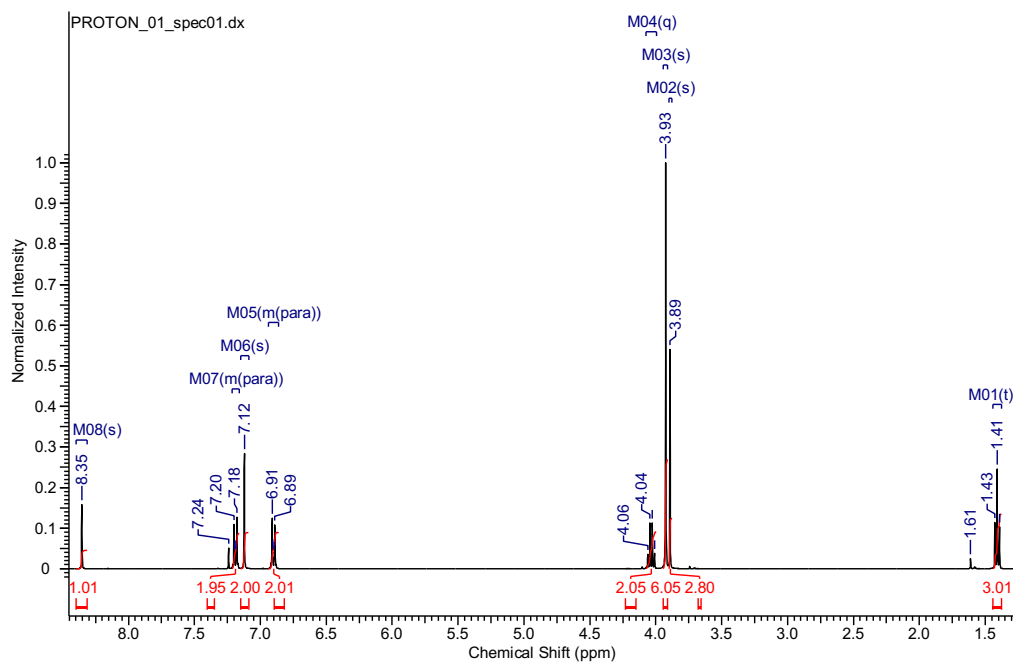

**Figure S8:**  $^1\text{H}$  NMR (400 MHz,  $\text{CHCl}_3$ ) spectrum of (9u)

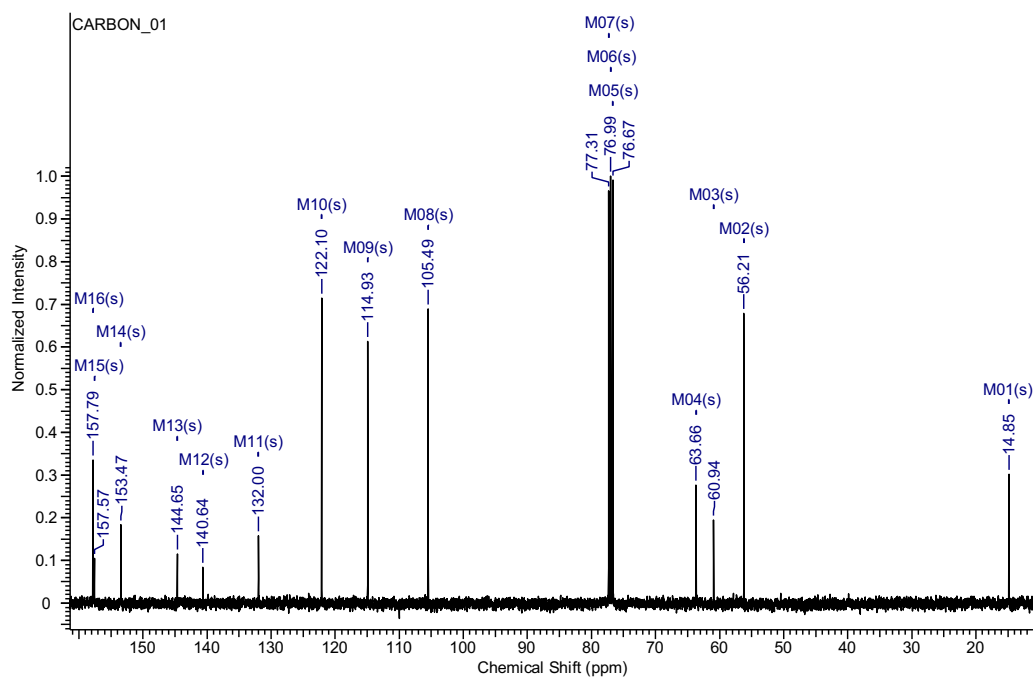

**Figure S9:**  $^{13}\text{C}$  NMR (101 MHz,  $\text{CHCl}_3$ ) spectrum of (9u)

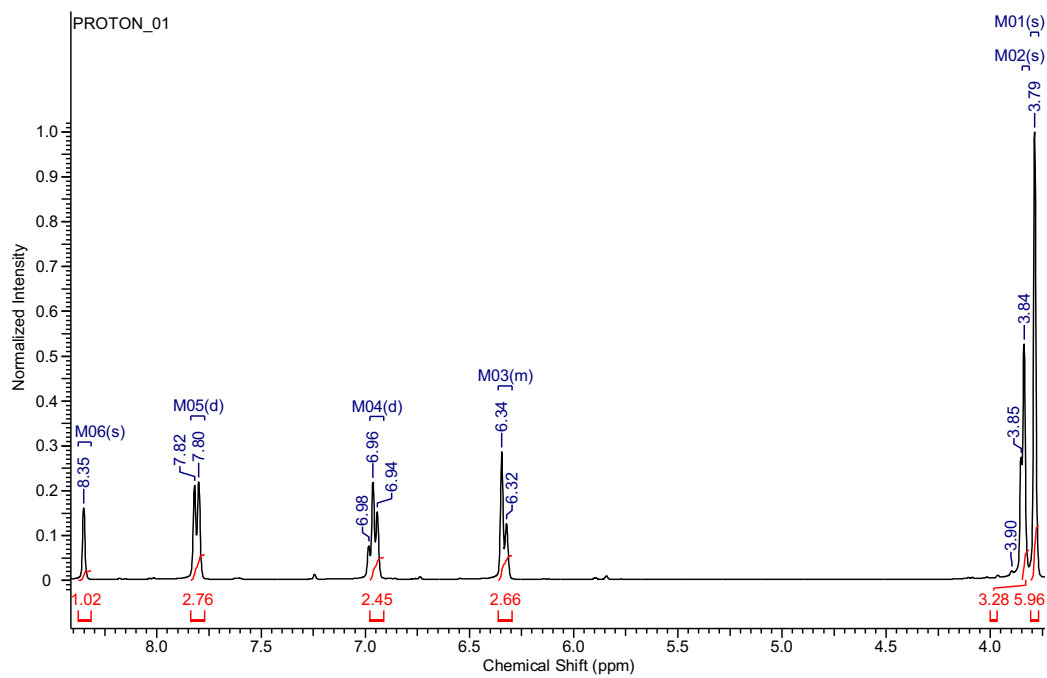

**Figure S10:**  $^1\text{H}$  NMR (400 MHz,  $\text{CHCl}_3$ ) spectrum of (9w)

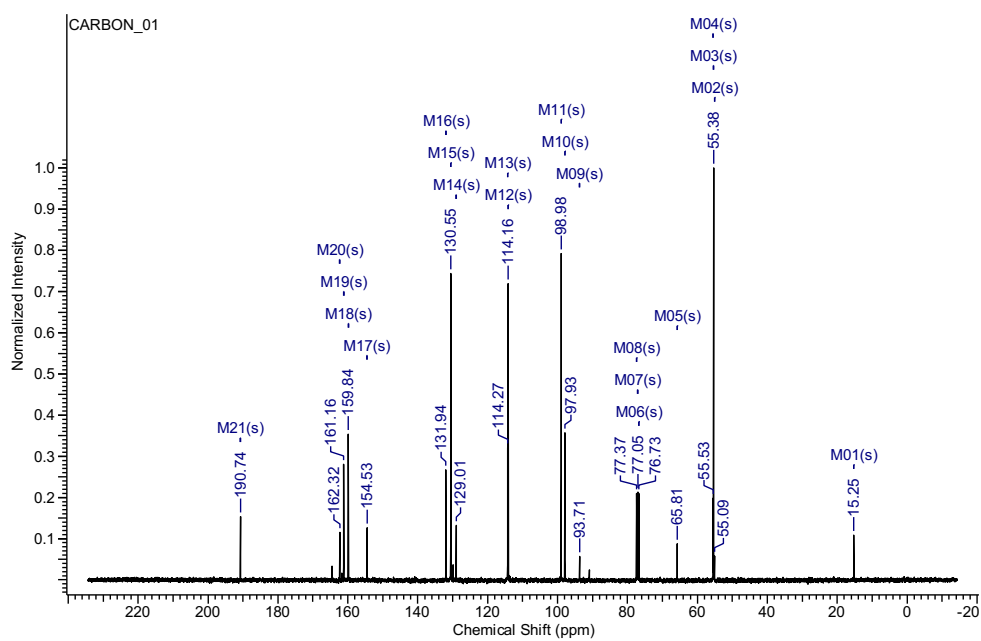

**Figure S11:**  $^{13}\text{C}$  NMR (101 MHz,  $\text{CHCl}_3$ ) spectrum of (9w)

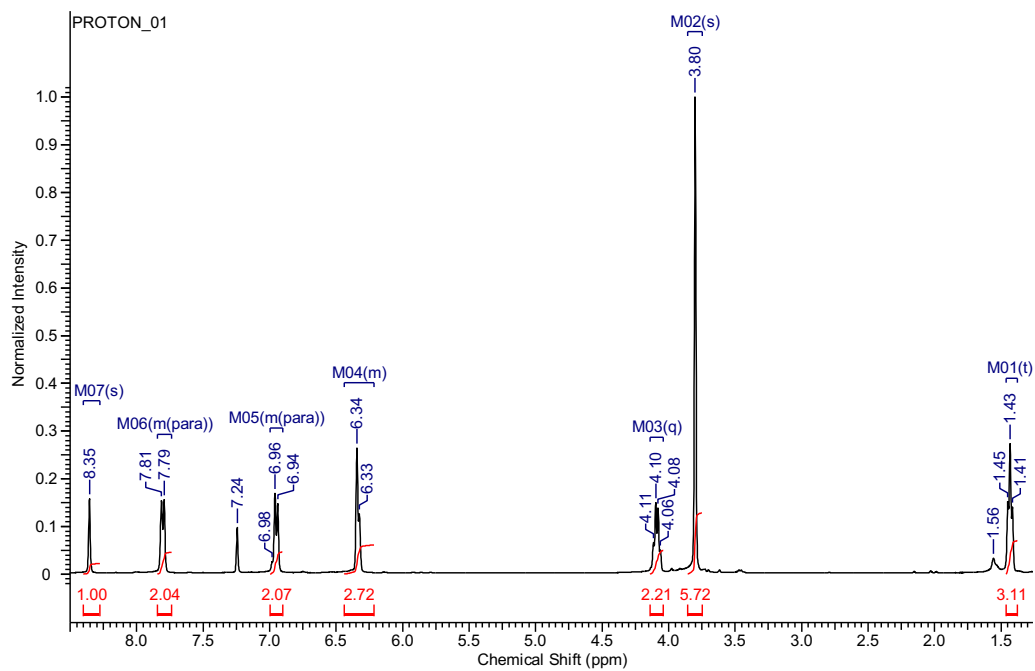

**Figure S12:**  $^1\text{H}$  NMR (400 MHz,  $\text{CHCl}_3$ ) spectrum of (**9x**)

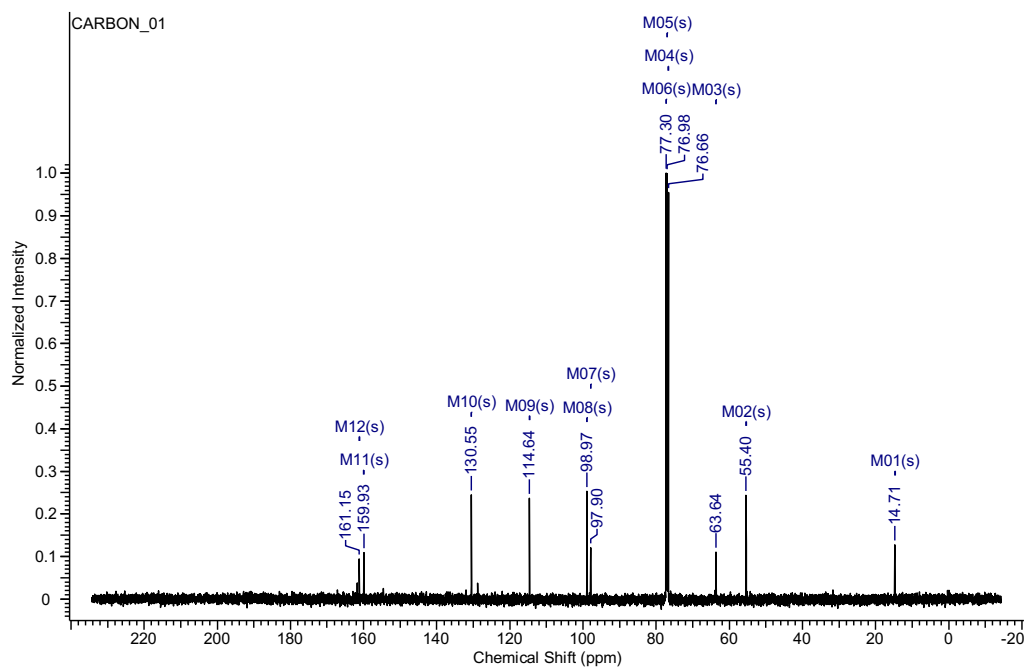

**Figure S13:**  $^{13}\text{C}$  NMR (101 MHz,  $\text{CHCl}_3$ ) spectrum of (**9x**)

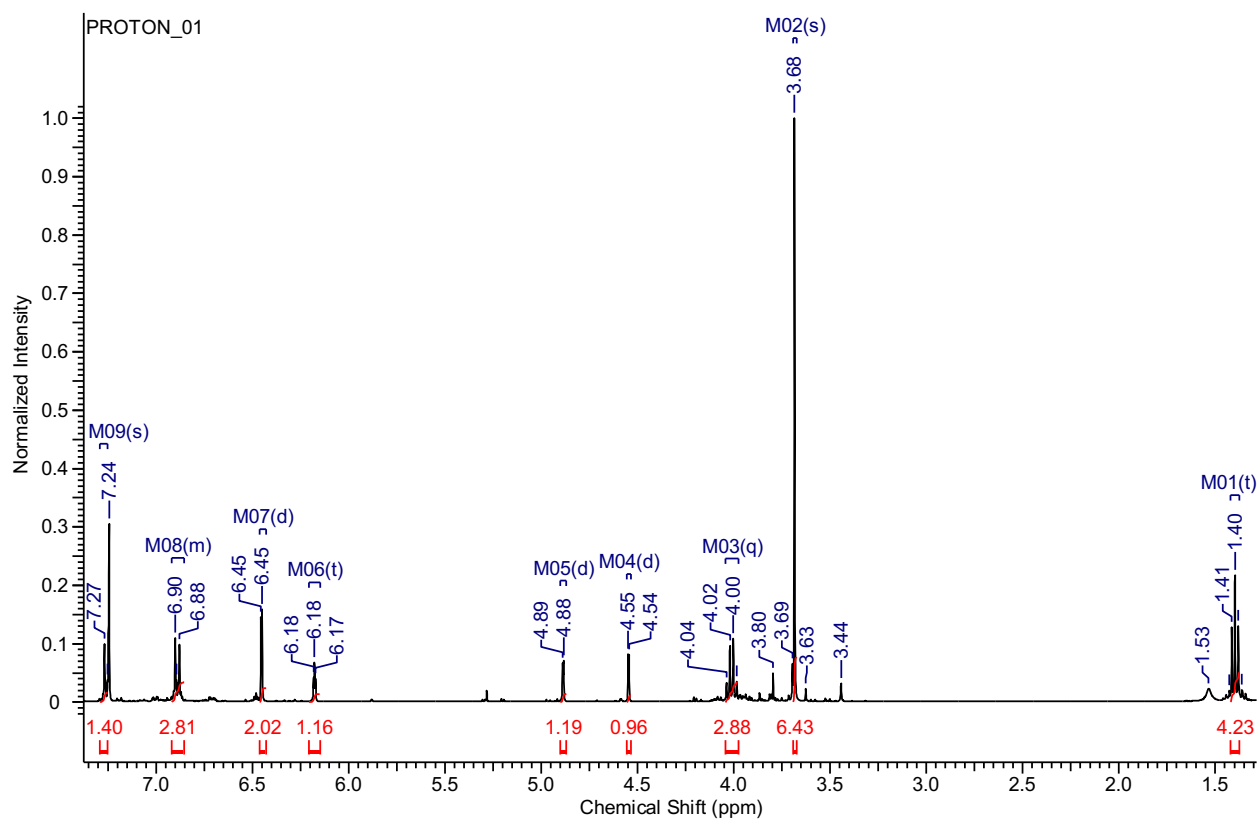

**Figure S14:**  $^1\text{H}$  NMR (400 MHz,  $\text{CHCl}_3$ ) spectrum of (14b)

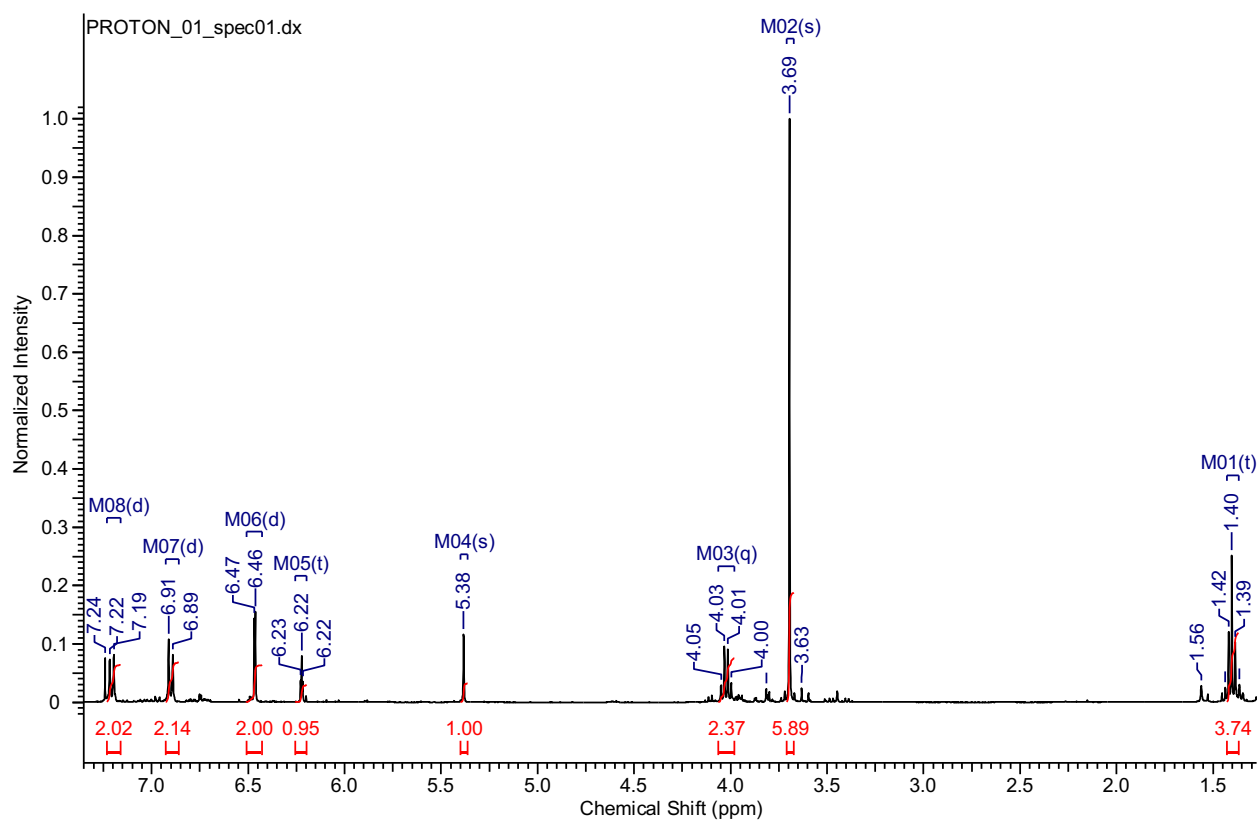

**Figure S15:**  $^1\text{H}$  NMR (400 MHz,  $\text{CHCl}_3$ ) spectrum of (15b)

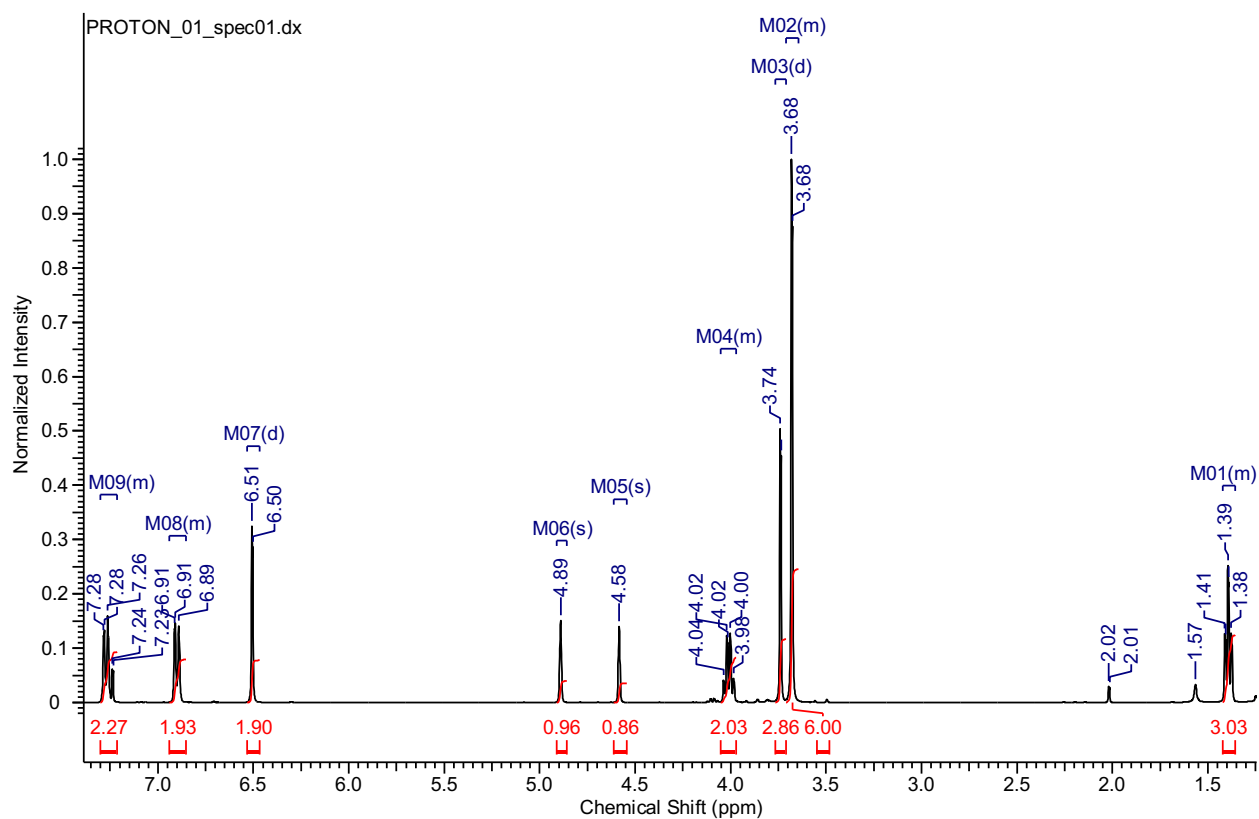

**Figure S16:**  $^1\text{H}$  NMR (400 MHz, CHLOROFORM- $d$ ) spectrum of (**10f**)

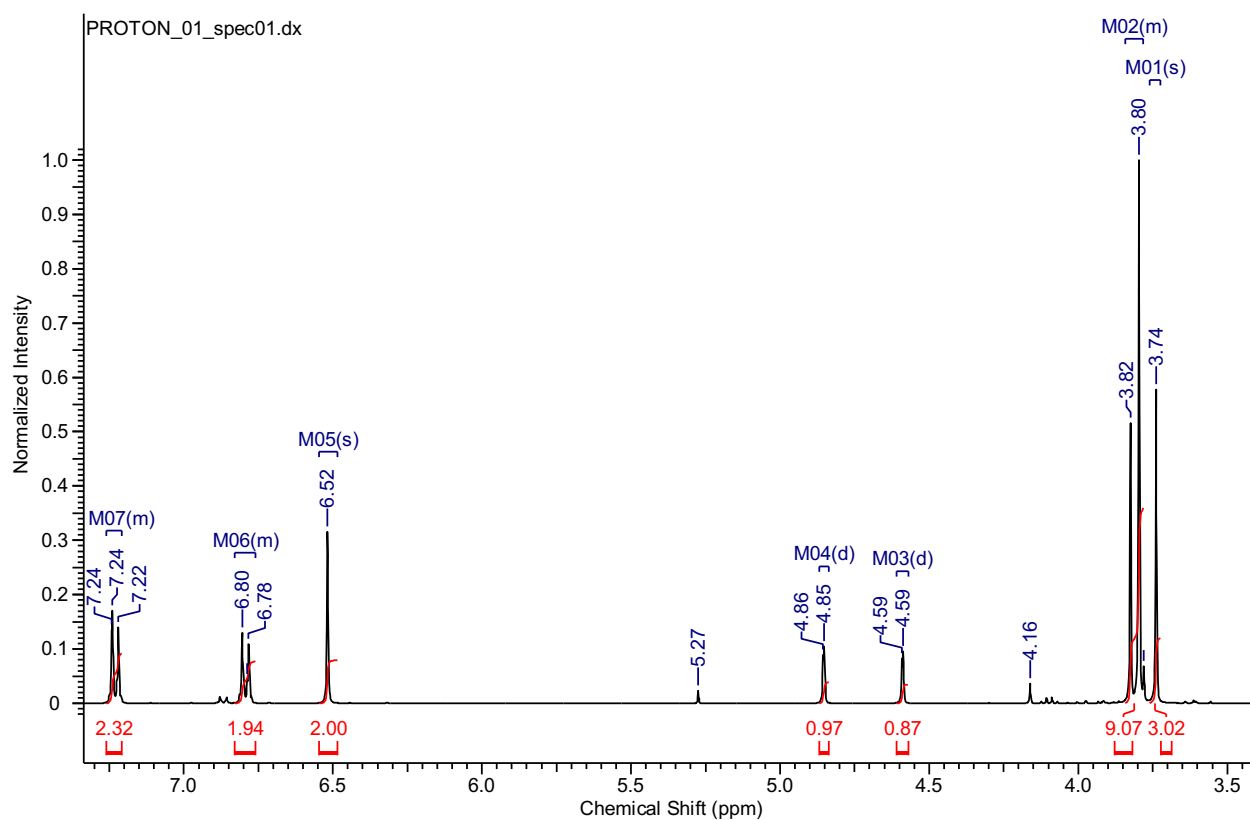

**Figure S17:**  $^1\text{H}$  NMR (400 MHz, CHLOROFORM- $d$ ) spectrum of (**12a**)



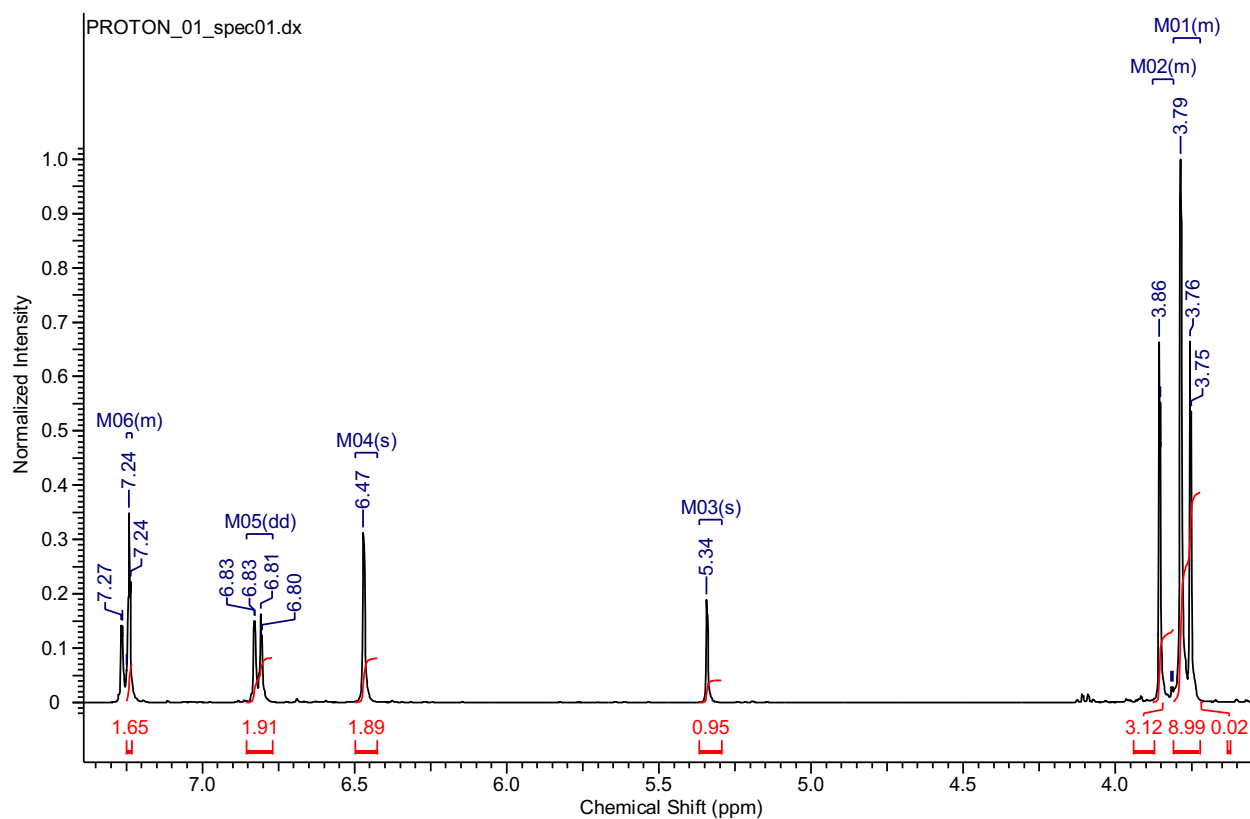

**Figure S18:**  $^1\text{H}$  NMR (400 MHz,  $\text{CHCl}_3$ - $d$ ) spectrum of (**13a**)

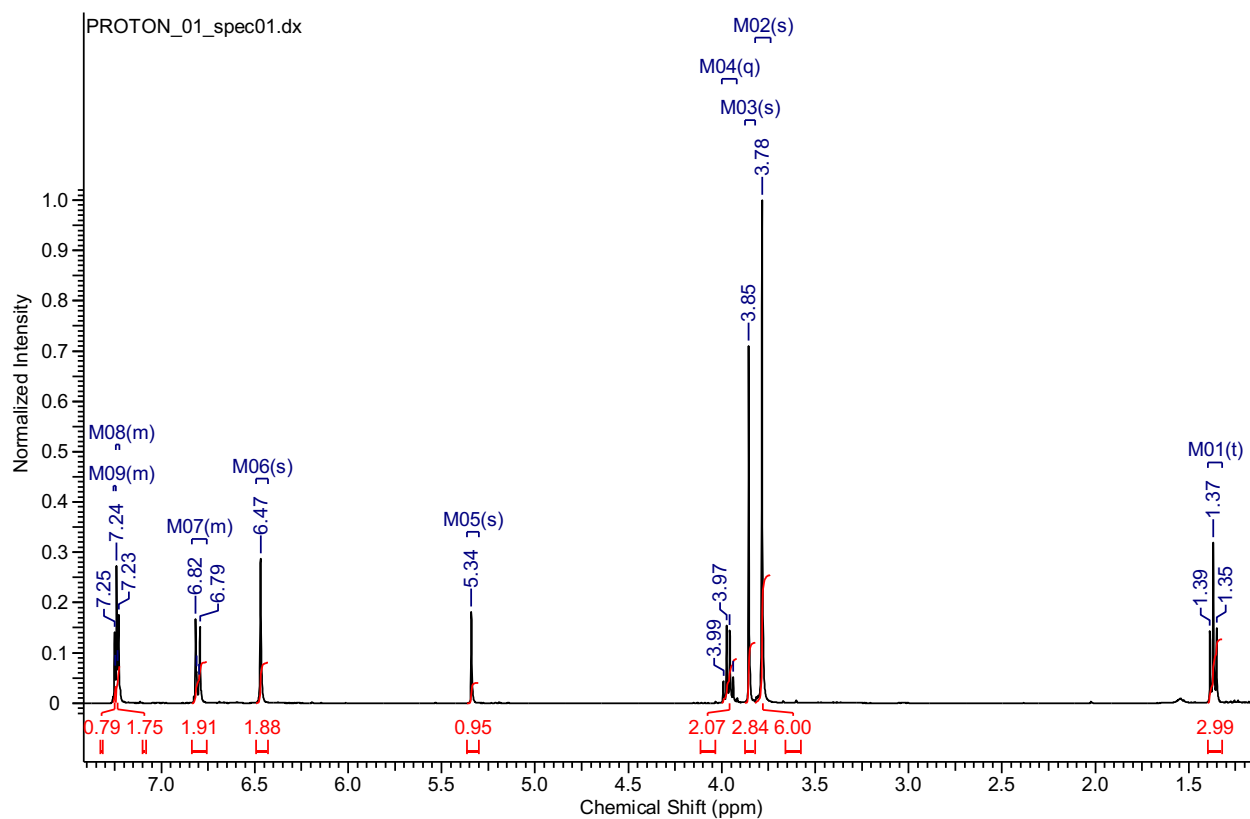

**Figure S19:**  $^1\text{H}$  NMR (400 MHz,  $\text{CHCl}_3$ - $d$ ) spectrum of (**11f**)

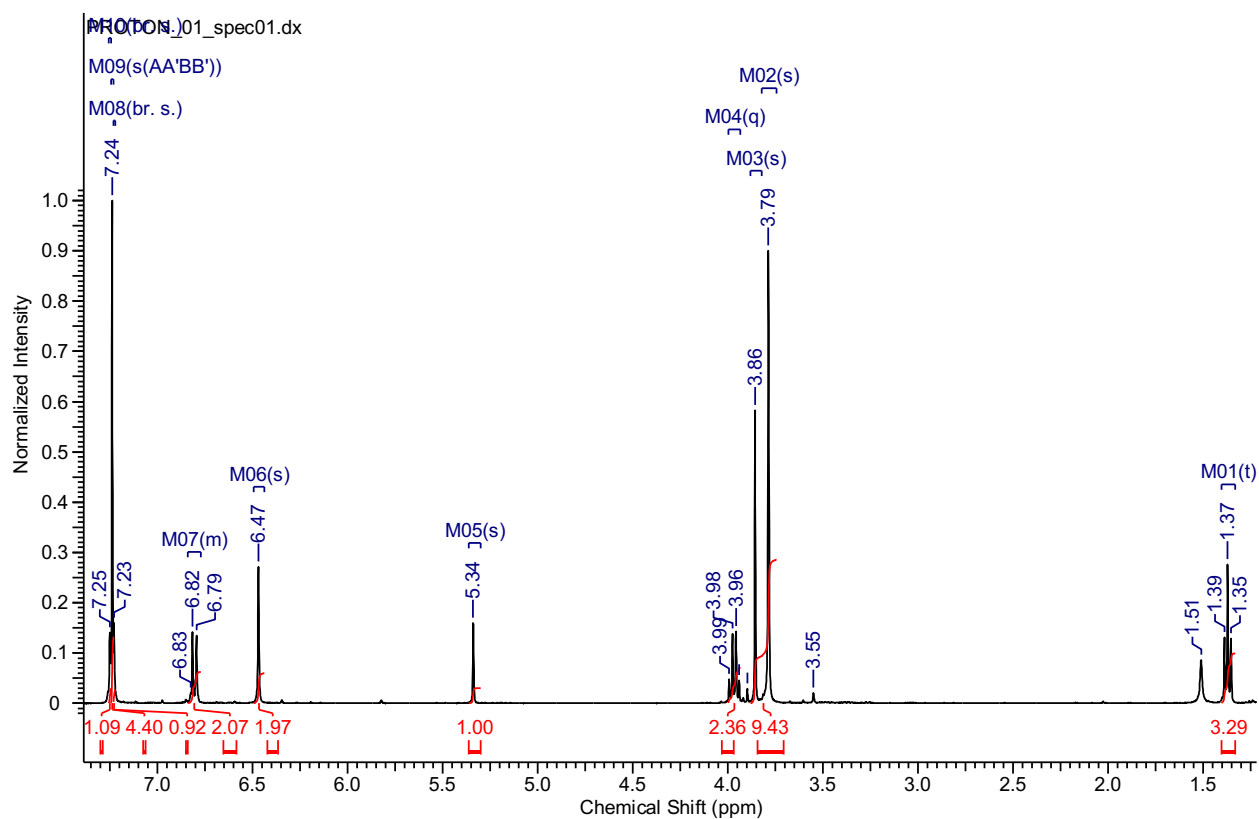

**Figure S20:**  $^1\text{H}$  NMR (400 MHz, CHLOROFORM-*d*) spectrum of (**13b**)

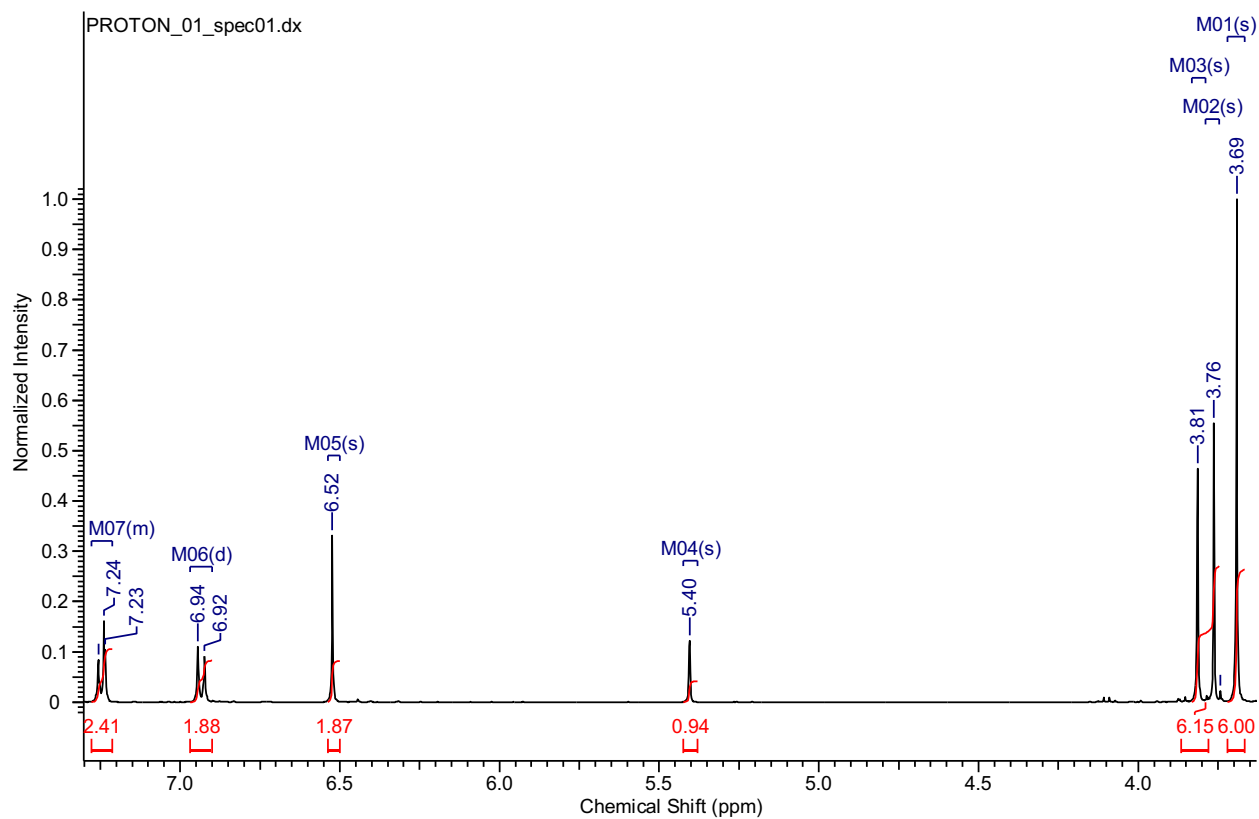

**Figure S21:**  $^1\text{H}$  NMR (400 MHz, CHLOROFORM-*d*) spectrum of (**11e**)



## References

1. Malebari, A.M., et al., *beta-Lactam analogues of combretastatin A-4 prevent metabolic inactivation by glucuronidation in chemoresistant HT-29 colon cancer cells*. Eur J Med Chem, 2017. **130**: p. 261-285.
2. Malebari, A.M., et al., *beta-Lactams with antiproliferative and antiapoptotic activity in breast and chemoresistant colon cancer cells*. Eur J Med Chem, 2020. **189**: p. 112050.
